# Supplementary material for: Magnetosensitive neurons mediate geomagnetic orientation in Caenorhabditis elegans
Source: eLife journal article supplement (doi:10.7554/elife.07493), 2015-06-17
Supplement: supp [file elife-07493-supp-v1.zip]

Archive with 6 entries (6 files):
- elife_poa_e07493_Figure_4_figure_supplement_1.pdf
- elife_poa_e07493_Figure_1_figure_supplement_1.pdf
- elife_poa_e07493_Figure_7_figure_supplement_1.pdf
- elife_poa_e07493_Supplementary_File_1.xlsx
- elife_poa_e07493_Figure_2_figure_supplement_1.pdf
- elife_poa_e07493_Figure_6_figure_supplement_1.pdf
