# Supplementary material for: Magnetosensitive neurons mediate geomagnetic orientation in Caenorhabditis elegans
Source: eLife journal article supplement (doi:10.7554/elife.07493), 2015-06-17
Supplement: supp [file elife-07493-supp-v1.zip › elife_poa_e07493_Figure_1_figure_supplement_1.pdf]

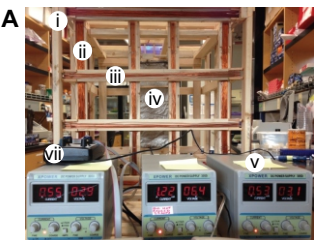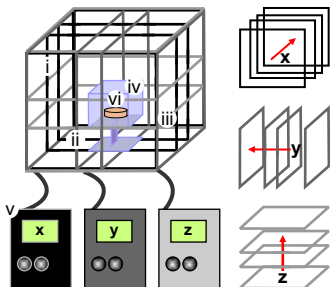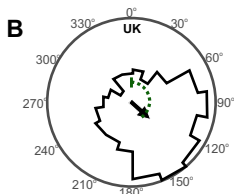

Imposed earth-strength (0.65G). The magnetic field vector points towards the zero.

**UK** Location where the strain was originally isolated.

Histogram of migration of well-fed population in 20 degree bins. The radius of the circle represents 10% of the sampled population.

Histogram of migration of worms starved for 30 minutes in 20 degree bins.

Mean direction vector of well-fed population. If **all** worms converge in one direction, then vector length = radius; if **all** worms migrate at random, then vector length = zero.

Mean direction vector of population starved for 30 minutes. Length equals 0 if heading is random, and radius if all worms converge on a single direction.

Angle between the direction of the imposed magnetic field and the "up" direction at the native site.

Angle between the direction of the imposed magnetic field and the "down" direction at the native site.
