# Supplementary material for: Magnetosensitive neurons mediate geomagnetic orientation in Caenorhabditis elegans
Source: eLife journal article supplement (doi:10.7554/elife.07493), 2015-06-17
Supplement: supp [file elife-07493-supp-v1.zip › elife_poa_e07493_Supplementary_File_1.xlsx]

## Sheet: 1A
Table 1A.
Figure	Strain	Genotype	State	Origin/Treatment:Notes	Assays	Animals	Index	SEM	t-test	Lin. Reg.	Pear. Corr.	Mann-Whitney
1B	N2	WT	Starved	Bristol (UK)/Pipette horizontally aligned: north-south	40	2610	0	0.08
1B	N2	WT	Starved	Bristol (UK)/Pipette horizontally aligned: east-west	40	3228	-0.03	0.06				P=0.383
1B	N2	WT	Starved	Bristol (UK)/Pipette vertically aligned	20	1041	-0.36	0.09				P=0.007
1B	N2	WT	Starved	Bristol (UK)/Pipette vertical: Magnetic field reversed	20	878	0.38	0.05				P<0.001
2G, 3D	N2	WT	Starved	Bristol (UK)/Pipette vertically aligned	30	1492	-0.43	0.06
2G, 3D	N2	WT	Fed	Bristol (UK)/Pipette vertically aligned	9	571	0.32	0.05				P<0.001
3D	AB1	WT	Starved	Adelaide (Australia)/Pipette vertically aligned	11	734	0.35	0.09
3D	AB1	WT	Fed	Adelaide (Australia)/Pipette vertically aligned	10	613	-0.34	0.08	P<0.001
4C	Multiple	WT	Fed	Multiple/Mtx index vs. local field inclination	400	19417	-	-		R2=0.760	P=0.001
4E	Multiple	WT	Fed	Multiple/Mtx index vs. local field vertical strength	400	19417	-	-		R2=0.820	P<0.001
4	Multiple	WT	Fed	Multiple/Mtx index vs. local field total strength: (Not Shown)	400	19417	-	-		R2=0.555	P=0.009
4F	Multiple	WT	Fed	Multiple/Mtx index vs. local field horizontal strength	400	19417	-	-		R2=0.196	P=0.197
4	Multiple	WT	Fed	Multiple/Mtx index vs. (field inc.*vert. strength) (Not Shown)	400	19417	-	-		R2=0.850	P<0.001
4	N2	WT	Fed	Bristol (UK)/Magnet assay: No magnet	22	713	0.06	0.06
4	ED3077	WT	Fed	Nairobi (Kenya)/Magnet assay	28	1016	0.19	0.05	P=0.051
4	JU1171	WT	Fed	Concepción (Chile)/Magnet assay	12	576	0.26	0.05	P=0.032
4	CB4856	WT	Fed	Honolulu (USA)/Magnet assay	22	796	0.21	0.03	P=0.047
4	LKC34	WT	Fed	Antisiranana (Madagascar)/Magnet assay	23	947	0.28	0.06	P=0.0059
4	ED3052	WT	Fed	Ceres, (South Africa)/Magnet assay	13	1170	0.29	0.04	P=0.022
4	JU258	WT	Fed	Madeira (Portugal)/Magnet assay	16	625	0.31	0.08	P=0.009
4	GM209	WT	Fed	Seville (Spain)/Magnet assay	33	1199	0.34	0.08	P=0.0007
4	CB3199	WT	Fed	Pasadena (USA)/Magnet assay	13	561	0.35	0.06	P=0.0079
4	ED3024	WT	Fed	Edinburg (Scotland)/Magnet assay	32	1318	0.4	0.05	P=0.0001
4	QR25	WT	Fed	Montreal (Canada)/Magnet assay	17	537	0.46	0.04	P=0.0002
4	AB1	WT	Fed	Adelaide (Australia)/Magnet assay	25	1195	0.37	0.04	P=0.0006
5	N2	WT	Fed	Bristol (UK)/Magnet assay	166	8677	0.5	0.02
5	CB1515	mec-10(e1515)	Fed	Bristol (UK)/Magnet assay	14	538	0.43	0.05	P=0.41
5	KG1180	lite-1(ce314)	Fed	Bristol (UK)/Magnet assay	20	634	0.44	0.05	P=0.35
5	CZ3715	gcy-33(ok232)	Fed	Bristol (UK)/Magnet assay	14	987	0.45	0.06	P=0.55
5	BC442	che-1(p696)	Fed	Bristol (UK)/Magnet assay	29	114	0.31	0.06	P<0.001
5	BC442	ttx-1(p767)	Fed	Bristol (UK)/Magnet assay	20	610	-0.15	0.07				P<0.001
5	PY1283	ttx-1(oy29)	Fed	Bristol (UK)/Magnet assay	20	753	-0.05	0.07				P<0.001
5	IK597	gcy-23, 8, 18	Fed	Bristol (UK)/Magnet assay	13	537	-0.2	0.07				P<0.001
5	PR678	tax-4(p678)	Fed	Bristol (UK)/Magnet assay	31	1045	0.04	0.03				P<0.001
5	FK129	tax-4(ks11)	Fed	Bristol (UK)/Magnet assay	27	1105	-0.03	0.04				P<0.001
5	PR694	tax-2(p694)	Fed	Bristol (UK)/Magnet assay	14	652	0.07	0.06				P<0.001
5	PR671	tax-2(p671)	Fed	Bristol (UK)/Magnet assay	30	1641	-0.04	0.04				P<0.001
6A	JPS264	WT	Fed	Bristol (UK)/Magnet assay: AFD control	10	232	0.34	0.07
6A	JPS264	WT	Fed	Bristol (UK)/Magnet assay: AFD ablated	23	331	0.05	0.07	P=0.017
6A	JPS486	WT	Fed	Bristol (UK)/Magnet assay: ASE control	10	347	0.36	0.05
6A	JPS486	WT	Fed	Bristol (UK)/Magnet assay: ASE ablated	10	348	0.3	0.05	P=0.48
6A	JPS493	WT	Fed	Bristol (UK)/Magnet assay: AWC control	12	301	0.34	0.1
6A	JPS493	WT	Fed	Bristol (UK)/Magnet assay: AWC ablated	12	238	0.46	0.05	P=0.27
6A	OS2526	WT	Fed	Bristol (UK)/Magnet assay: AM Sheath glia control	20	533	0	0.04
6A	OS2248	WT	Fed	Bristol (UK)/Magnet assay: AM Sheath glia ablated	20	673	-0.01	0.04	P<0.001
6B	FK129	tax-4(ks11)	Fed	Bristol (UK)/Magnet assay: tax-4 control	21	796	-0.01	0.04
6B	FK129	tax-4(ks11)	Fed	Bristol (UK)/Magnet assay: tax-4 rescued in AFD	28	684	0.31	0.05	P<0.001
6B	PR478	tax-4(p678)	Fed	Bristol (UK)/Magnet assay: tax-4 control	11	285	0.09	0.05
6B	PR478	tax-4(p678)	Fed	Bristol (UK)/Magnet assay: tax-4 rescued in all tax-4 neurons	12	238	0.46	0.05	P<0.001
6B	BR5602	tax-4(p678);byEx836[Podr-4::tax-4::gfp;myo- 2::mCherry]	Fed	Bristol (UK)/Magnet assay: tax-4 control	10	168	-0.03	0.03
6B	BR5602	tax-4(p678);byEx836[Podr-4::tax-4::gfp;myo- 2::mCherry]	Fed	Bristol (UK)/Magnet assay: tax-4 rescued all tax-4 neurons but AFD	10	221	0	0.03	P=0.230
6	BR5602	tax-4(p678);byEx836[Podr-4::tax-4::gfp;myo- 2::mCherry]	Fed	Bristol (UK)/Chemotaxis assay: tax-4 control (Not Shown)	6	34	-0.03	0.12
6	BR5602	tax-4(p678);byEx836[Podr-4::tax-4::gfp;myo- 2::mCherry]	Fed	Bristol (UK)/Chemotaxis assay: tax-4 rescued in all tax-4 neurons but AFD (Not Shown)	6	70	0.75	0.09	P<0.001
6F	JPS458	tax-4(ks11)	Starved	Bristol (UK)/Burrowing assay: tax-4 control	10	215	-0.1	0.07
6F	JPS458	tax-4(ks11)	Starved	Bristol (UK)/Burrowing assay: tax-4 rescued in all tax-4 neurons	10	300	-0.43	0.09	P<0.001
6F	BR5602	tax-4(p678);byEx836[Podr-4::tax-4::gfp;myo- 2::mCherry]	Starved	Bristol (UK)/Burrowing assay: tax-4 control	10	252	-0.3	0.12
6F	BR5602	tax-4(p678);byEx836[Podr-4::tax-4::gfp;myo- 2::mCherry]	Starved	Bristol (UK)/ Burrowing assay: tax-4 rescued in all tax-4 neurons but AFD	10	96	-0.06	0.12	P<0.001
6F	JPS264	WT	Starved	Bristol (UK)/Burrowing assay: AFD control	8	188	-0.45	0.14
6F	JPS264	WT	Starved	Bristol (UK)/Burrowing assay: AFD ablated	10	299	-0.1	0.03				P=0.044
6F	JPS545	WT	Starved	Adelaide (Australia)/Burrowing assay: AFD control	12	204	0.53	0.11
6F	JPS545	WT	Starved	Adelaide (Australia)/Burrowing assay: AFD ablated	12	139	0.02	0.01				P<0.001
7K	JPS275	lite-1(ce314)	Fed	Bristol (UK)/GCaMP3 in AFD: microfl. chip, 0.0000 Gauss stim	11	11	-0.25	0.15
7K	JPS275	lite-1(ce314)	Fed	Bristol (UK)/GCaMP3 in AFD: microfl. chip, 0.6500 Gauss stim	11	11	1.84	0.57	P<0.001
7K	JPS275	lite-1(ce314)	Fed	Bristol (UK)/GCaMP3 in AFD: microfl. chip, 0.0650 Gauss stim	11	11	1.6	0.91	P=0.008
7K	JPS275	lite-1(ce314)	Fed	Bristol (UK)/GCaMP3 in AFD: microfl. chip, 0.0065 Gauss stim	6	6	1.68	1.01	P=0.015
7K	JPS496	unc-13(e1091)	Fed	Bristol (UK)/GCaMP3 in AFD: microfl. chip, 0.6500 Gauss stim	6	6	1.64	0.65	P=0.003
7K	JPS495	unc-31(e928)	Fed	Bristol (UK)/GCaMP3 in AFD: microfl. chip, 0.6500 Gauss stim	6	6	7.63	2.45	P<0.001
7K	JPS540	tax-4(p678)	Fed	Bristol (UK)/GCaMP3 in AFD: microfl. chip, 0.6500 Gauss stim	14	14	0.11	0.76	P=0.341
7K	CX11935	WT	Fed	Bristol (UK)/GCaMP3 in AWC: microfl. chip, 0.6500 Gauss stim	7	7	-0.43	2.63	P=0.466
S3B	N2	WT	Fed	Bristol (UK)/Magnet assay: No magnet	22	713	0.06	0.06
S3B	N2	WT	Fed	Bristol (UK)/Magnet assay: Magnet in light	166	8677	0.5	0.02				P<0.001
S3B	N2	WT	Fed	Bristol (UK)/Magnet assay: Magnet in dark	36	661	0.46	0.05	P<0.001
S3B	N2	WT	Fed	Bristol (UK)/Magnet assay: No NaN3 (Not Shown)	2	31	0.67	0.11	P=0.008
S4A	JPS264	WT	Fed	Bristol (UK)/Chemotaxis assay: AFD control	5	68	0.99	0.01
S4A	JPS264	WT	Fed	Bristol (UK)/Chemotaxis assay: AFD ablated	10	362	0.94	0.06	P=0.272
S5B	JPS275	lite-1(ce314)	Fed	Bristol (UK)/GCaMP3 in AFD: freely moving	6	6	24.35	4.74
S5B	JPS540	tax-4(p678)	Fed	Bristol (UK)/GCaMP3 in AFD: freely moving	5	5	1.83	6.91	P=0.014
S5B	CX11935	WT	Fed	Bristol (UK)/GCaMP3 in AWC: freely moving	5	5	-1.08	1.73	P<0.001
S5B	JPS496	unc-13(e1091)	Fed	Bristol (UK)/GCaMP3 in AFD: freely moving	5	5	17.08	2.68	P=0.11
S5B	JPS495	unc-31(e928)	Fed	Bristol (UK)/GCaMP3 in AFD: freely moving	5	5	14.33	6.8	P=0.13
S5C	JPS275	lite-1(ce314)	Fed	Bristol (UK)/Magnet assay: AFD control	5	92	0.56	0.13
S5C	JPS275	lite-1(ce314)	Fed	Bristol (UK)/Magnet assay: AFD expressing GCaMP3	3	47	0.43	0.13	P=0.475

## Sheet: 1B
Table 1B.
Strain	Genotype	Origin	Animals	Assays	State	Field strength (Gauss)	Local field to 'up' angle (Degrees)	Mean vector angle (Degrees)	V test	Local field to 'down' angle (Degrees)	Angular variance (Degrees)	Angular deviation (Degrees)	Skewness	Kurtosis	Rayleigh test
N2	WT	Bristol/UK	1268	28	Fed	0	156.3	30.7	P = 0.869	336.3	55.1	79.5	0.0264	-0.0215	P=0.1616
N2	WT	Bristol/UK	1139	37	Fed	0.325	156.3	104.3	P = 0.034	336.3	52	77.2	-0.0555	0.0458	P<4.90X10-5
N2	WT	Bristol/UK	1403	28	Fed	0.65	156.3	132	P<1.0X10-20	336.3	40.4	68.1	-0.0152	0.0626	P<3.54x10-50
N2	WT	Bristol/UK	1079	8	Starved	0.65	156.3	304.6	P<1.32X10-12	336.3	45.6	72.3	-0.152	0.0709	P<1.64x10-20
CB4856	WT	Hawaii/USA	690	18	Fed	0.65	127.6	121.4	P<1.65X10-7	307.6	49.4	75.2	-0.043	-0.0045	P<1.76x10-6
CB4856	WT	Hawaii/USA	592	13	Starved	0.65	127.6	283.3	P<4.73X10-8	307.6	47.6	73.9	-0.0183	0.0545	P<3.5x10-8
AB1	WT	Adelaide/Australia	535	14	Fed	0.65	336.5	302.63	P<3.27X10-8	156.5	46	72.6	-0.0238	0.0616	P<5.7X10-10
AB1	WT	Adelaide/Australia	100	6	Starved	0.65	336.5	117.39	P = 0.002	156.5	42.3	69.7	0.0728	0.0246	P<9.5x10-4
PR767	ttx-1	Bristol/UK	251	10	Fed	0.65	156.3	6	P = 0.71	336.3	52.6	77.6	-0.0526	0.0313	P=0.186
PR691	tax-2	Bristol/UK	919	24	Fed	0.65	156.3	314.4	P = 0.998	336.3	47.7	73.9	-0.0854	-0.0343	P=0.006
FK129	tax-4	Bristol/UK	1088	17	Fed	0.65	156.3	226.34	P = 0.347	336.3	55.9	80	0.0479	0.0456	P=0.5175
BR5602	tax-4(p678);byEx836[Podr-4::tax-4::gfp;myo-2::mCherry]	Bristol/UK	252	10	Fed/ctrl.	0.65	156.3	72.2	P = 0.422	336.3	48.8	111.7	0.1396	0.1565	P=0.1371
BR5602	tax-4(p678);byEx836[Podr-4::tax-4::gfp;myo-2::mCherry]	Bristol/UK	96	10	Fed/test	0.65	156.3	149	P = 0.118	336.3	52.1	77.3	-0.328	-0.1204	P=0.492

## Sheet: 1C
Table 1C
Strain	Identifier (Fig. 5)	Country	City	Latitud (Degrees)	Longitude (Degrees)	Total field strength (Gauss)	Field inclination (Degrees)	Vertical field strength (Gauss)	Animals	Assays	Magnetic index (mean/SEM)
CB4856	A	USA	Honolulu	21N	157W	0.35	37.6	0.22	796	22	0.21/0.03
CB3199	Red	USA	Pasadena	34N	118W	0.47	59	0.41	561	13	0.35/0.06
QR25	B	Canada	Montreal	45N	73W	0.54	70.2	0.51	537	17	0.46/0.04
JU1171	C	Chile	Concepción	36S	73W	0.25	37	0.15	576	12	0.26/0.05
JU258	D	Portugal	Madeira	33N	17W	0.41	44.9	0.29	625	16	0.31/0.08
GM209	E	Spain	Seville	37N	6W	0.43	51	0.34	1199	33	0.34/0.08
ED3024	F	Scotland	Edinburg	56N	3W	0.5	69.5	0.47	1318	32	0.40/0.05
N2	Blue	England	Bristol	51N	3W	0.49	66.3	0.45	8677	166	0.50/0.02
ED3052	G	South Africa	Ceres	33S	19E	0.26	66	0.24	1170	13	0.29/0.04
LCK34	I	Madagascar	-	12S	49E	0.35	42	0.24	947	23	0.28/0.06
ED3077	H	Kenya	Nairobi	1S	36E	0.34	23.5	0.14	1016	28	0.19/0.05
AB1	J	Australia	Adelaide	34S	138E	0.59	66.5	0.54	1995	25	0.37/0.04

## Sheet: 1D
Table 1D
Strain	Background	Array	Manipulation	Targets	Array Present	Assays	Animals	Magnetic index (mean/SEM)
N2	N2/WT	n.a.	n.a.	n.a.	n.a.	166	8677	0.50/0.02
JPS264	N2/WT	Pgcy-8::ICE	cell ablation	AFD sensory neurons	Yes	23	331	0.05/0.07
JPS264	N2/WT	Pgcy-8::ICE	cell ablation	AFD sensory neurons	No	10	232	0.34/0.07
JPS316	lite-1	Pgcy-8::GCaMP3	GCaMP3 expression	AFD sensory neurons	Yes	11	227	0.40/0.05
JPS316	lite-1	Pgcy-8::GCaMP3	GCaMP3 expression	AFD sensory neurons	No	11	403	0.40/0.09
JPS458	tax-4 (ks11)	Pgcy-8::tax-4	tax-4 rescue	AFD sensory neurons	Yes	28	684	0.31/0.05
JPS458	tax-4 (ks11)	Pgcy-8::tax-4	tax-4 rescue	AFD sensory neurons	No	21	796	-0.01 /0.04
JPS540	tax-4 (p678)	Ptax-4::tax-4	tax-4 rescue	tax-4 expressing cells	Yes	11	90	0.38/0.08
JPS540	tax-4 (p678)	Ptax-4::tax-4	tax-4 rescue	tax-4 expressing cells	No	11	285	0.09/0.05
JPS493	N2/WT	Pstr-2::ICE	cell ablation	AWC sensory neurons	Yes	12	238	0.46/0.05
JPS493	N2/WT	Pstr-2::ICE	cell ablation	AWC sensory neurons	No	12	301	0.34/0.10
JPS486	N2/WT	Pche-1::ICE	cell ablation	ASE sensory neurons	Yes	10	348	0.30/0.05
JPS486	N2/WT	Pche-1::ICE	cell ablation	ASE sensory neurons	No	10	347	0.36/0.05

## Sheet: 1E
Table 1E
Number	Strain	Genotype
1	PR696	che-1(p696) I.
2	CB3323	che13(e1805) I.
3	MT1072	egl-4(n477) IV.
4	CZ3715	gcy-33(ok232) V.
5	IK597	gcy-23(nj37) gcy-8(oy44) gcy-18(nj38) IV.
6	KG1180	lite-1(ce314) X.
7	CB1515	mec-10(e1515) X.
8	OS2526	nsIs109 [F16F9.3 pro::DT-A(G53E) + unc-122 pro::GFP].
9	OS2248	nsIs113 [F16F9.3 pro::DT-A(G53E) + unc-122 pro::GFP].
10	CX11935	kyEx3252 [str-2::GCaMP3; unc-122::GFP].
11	PR691	tax-2(p691) I.
12	PR694	tax-2(p694) I.
13	PR678	tax-4(p678) III.
14	FK129	tax-4(ks11) III.
15	PY1283	ttx-1(oy29) oyIs17 V.
16	BC442	ttx-1(p767) V.
17	CB1091	unc-13(e1091) I.
18	CB928	unc-31(e928) IV.
19	N2	Wild isolate: Bristol, England
20	GM209	Wild isolate: Seville, Spain
21	LKC34	Wild isolate: (unknown), Madagascar
22	JU1171	Wild isolate: Concepción, Chile
23	ED3052	Wild isolate: Ceres, South Africa
24	QR25	Wild isolate: Montreal, Canada
25	CB3199	Wild isolate: Pasadena, USA
26	ED3024	Wild isolate: Edinburg, Scotland
27	ED3077	Wild isolate: Nairobi, Kenya
28	JU258	Wild isolate: Madeira, Portugal
29	CB4856	Wild isolate: Hawaii, USA
30	AB1	Wild isolate: Adelaide, Australia
31	JPS264	vxEx264[Pgcy-8::ICE::unc54UTR; Pmyo-2::mCherry::unc-54UTR] #1
32	JPS265	vxEx265[Pgcy-8::ICE::unc54UTR; Pmyo-2::mCherry::unc-54UTR] #2
33	JPS271	vxEx271[Pgcy-8::ICE::unc54UTR; Pmyo-2::mCherry::unc-54UTR] #3
34	JPS275	lite-1(ce314) vxEx275[Pgcy-8::GCaMP3::unc54UTR; Pmyo-3::mCherry::unc-54UTR] #1
35	JPS294	vxEx294[Pgcy-8::GCaMP3::unc54UTR; Pmyo-3::mCherry::unc-54UTR] #2
36	JPS315	vxEx315[Pgcy-8::GCaMP3::unc54UTR; Pmyo-3::mCherry::unc-54UTR] #3
37	JPS316	vxEx316[Pgcy-8::GCaMP3::unc54UTR; Pmyo-3::mCherry::unc-54UTR] #4
38	JPS458	tax-4(ks11) III; VxEx458[Pgcy-8::tax-4(+)::unc54UTR; Pmyo-2::mCherry::unc-54UTR] #1
39	JPS459	tax-4(ks11) III; VxEx459[Pgcy-8::tax-4(+)::unc54UTR; Pmyo-2::mCherry::unc-54UTR] #2
40	JPS496	unc-13(e1091) I; VxEx316[Pgcy-8::GCaMP3::unc54UTR; Pmyo-3::mCherry::unc-54UTR]
41	JPS495	unc-31(e928) IV; VxEx316[Pgcy-8::GCaMP3::unc54UTR; Pmyo-3::mCherry::unc-54UTR]
42	JPS540	tax-4(p678) III; VxEx[Pgcy-8::tax-4::unc-54 UTR; Pmyo-2::mCherry::unc-54UTR] #2
43	JPS486	vxEx486[Pche-1::ICE::unc54UTR; Pmyo-2::mCherry::unc-54UTR]
44	JPS493	vxEx493[Pstr-2::ICE::unc54UTR; Pmyo-2::mCherry::unc-54UTR]
45	JPS527	oyIs18[gcy-8::GFP] VxEx271[Pgcy-8::ICE::unc54UTR; Pmyo-2::mCherry::unc-54UTR] #3
46	JPS545	AB1 vxEx545[Pgcy-8::ICE::unc54UTR; Pmyo-2::mCherry::unc-54UTR] #1
47	JPS546	AB1 vxEx546[Pgcy-8::ICE::unc54UTR; Pmyo-2::mCherry::unc-54UTR] #2
48	BR6502	tax-4(pr678) III; Ex836[Podr-4::tax-4::gfp;myo-2::mCherry]
