# Supplementary figures and images for: Magnetosensitive neurons mediate geomagnetic orientation in Caenorhabditis elegans
Source: eLife journal article supplement (doi:10.7554/elife.07493), 2015-06-17

**A**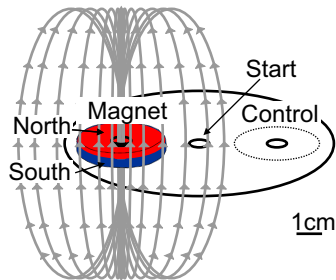**B**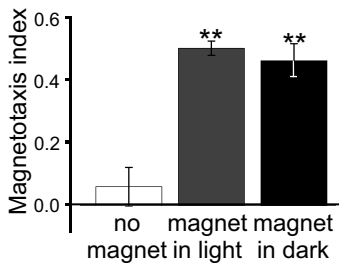

Supplement: supp [file elife-07493-supp-v1.zip › elife_poa_e07493_Figure_4_figure_supplement_1.pdf]

**A**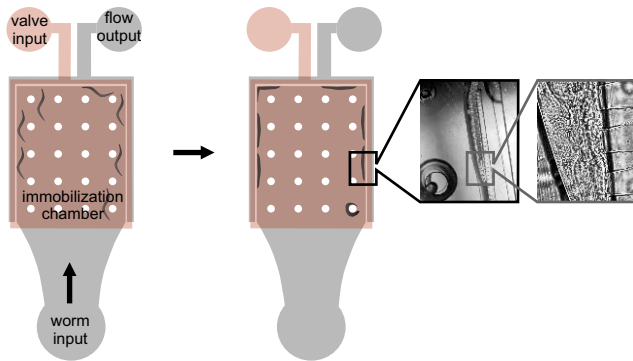**B**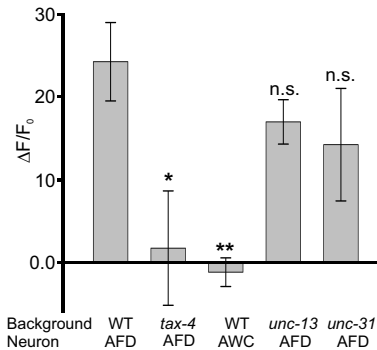**C**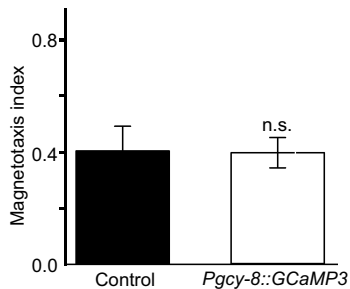

Supplement: supp [file elife-07493-supp-v1.zip › elife_poa_e07493_Figure_7_figure_supplement_1.pdf]

A

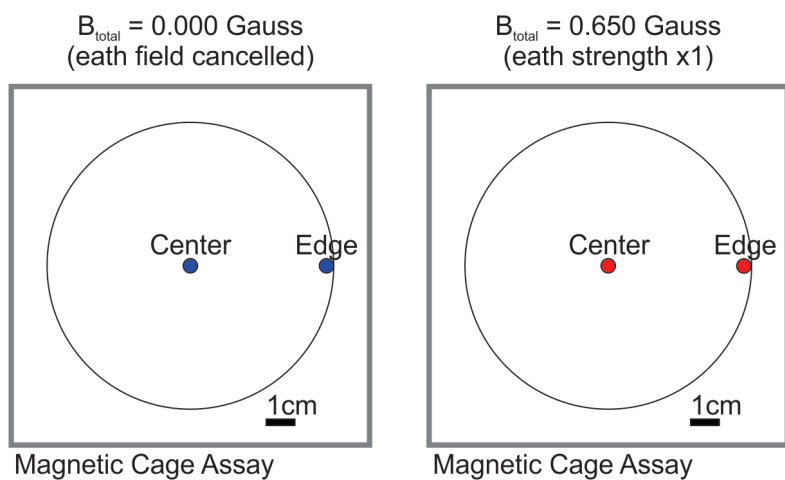

B

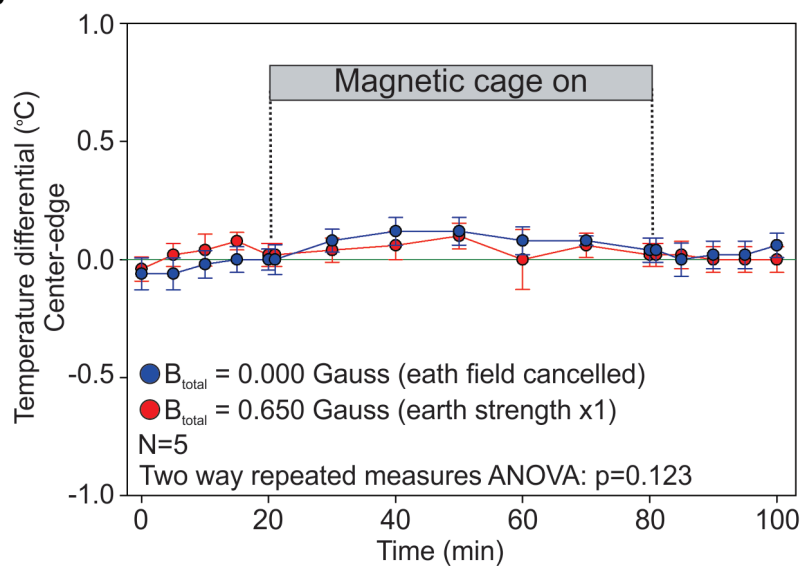

C

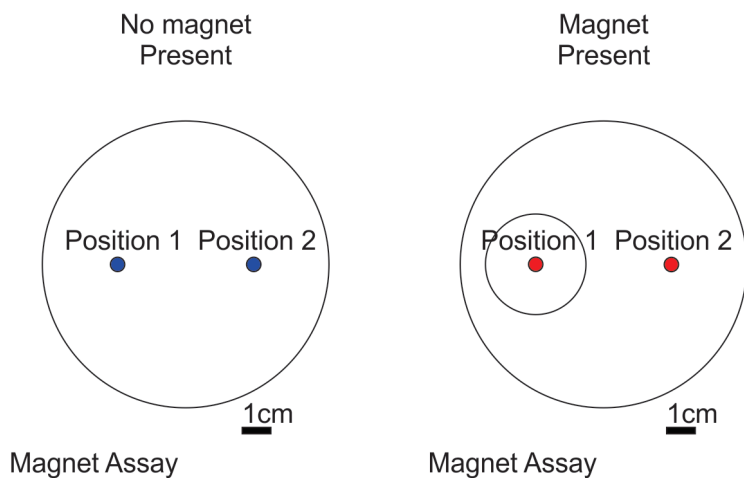

D

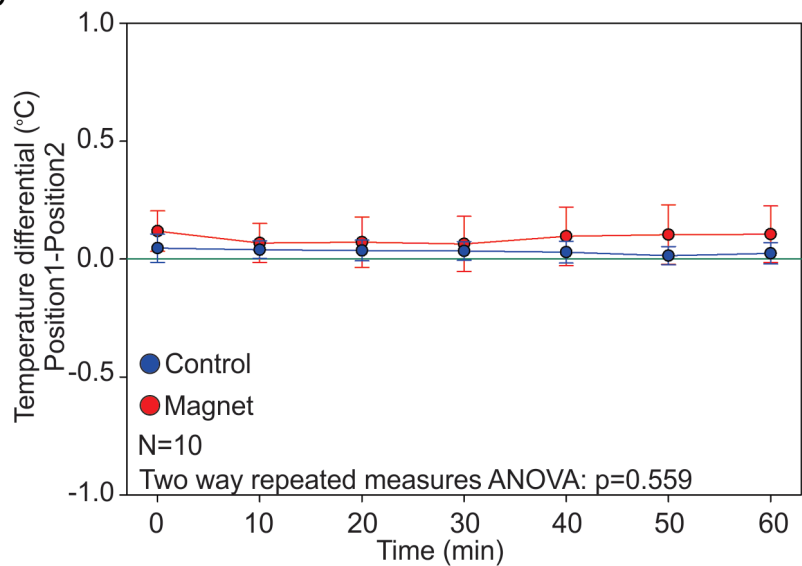

E

Thermometer Probe Calibration Check

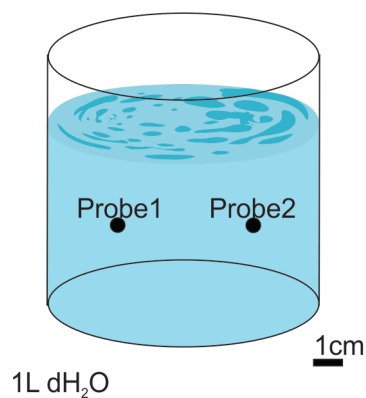

F

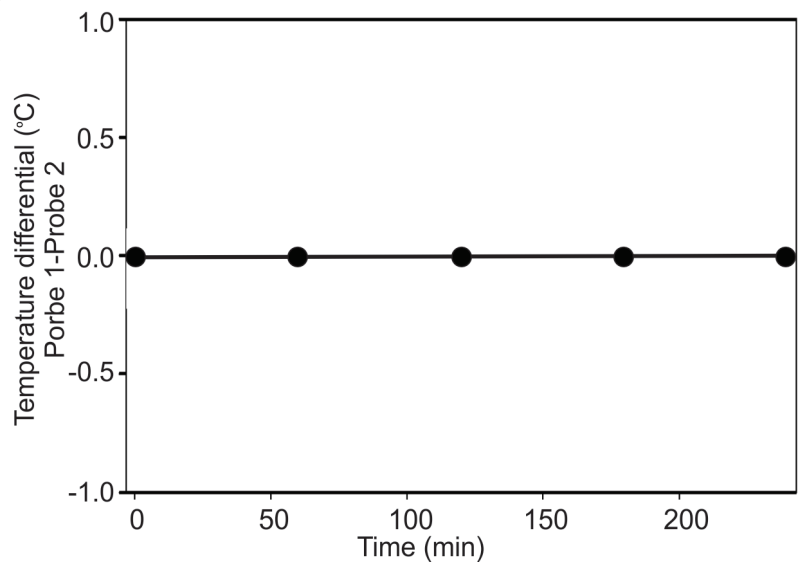

Supplement: supp [file elife-07493-supp-v1.zip › elife_poa_e07493_Figure_2_figure_supplement_1.pdf]

**A**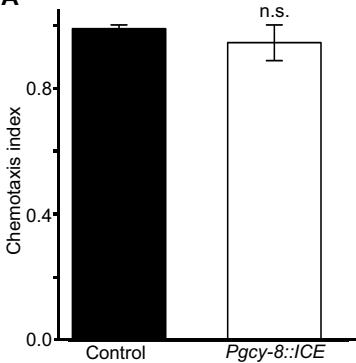**B**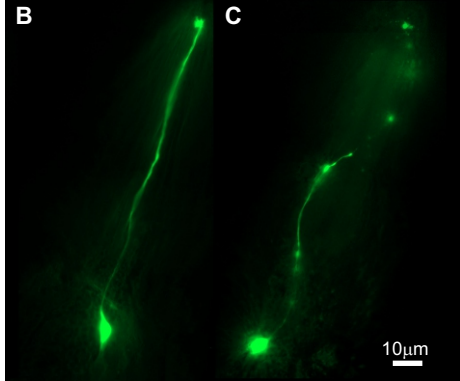**C**

Supplement: supp [file elife-07493-supp-v1.zip › elife_poa_e07493_Figure_6_figure_supplement_1.pdf]
